# Supplementary material for: High-resolution targeted 3C interrogation of cis-regulatory element organization at genome-wide scale
Source: PubMed Central journal article supplement (PMC7822813; doi:10.1038/s41467-020-20809-6), 2021-01-22
Supplement: 41467_2020_20809_MOESM2_ESM.pdf [file 41467_2020_20809_MOESM2_ESM.pdf]

**Supplementary Data 1. 3C digestion efficiency primers**

| <b>Assay Set</b> | <b>Sequence</b>        | <b>Length</b> | <b>Tm</b> | <b>GC %</b> | <b>Amplicon</b> |
|------------------|------------------------|---------------|-----------|-------------|-----------------|
| Dpn_cut_fwd      | GGAGAAAGAAGGCTGGTGTAT  | 22            | 62.23     | 45.45       | 105             |
| Dpn_cut_rev      | TATCTGAGTTGGACAGCATTGG | 22            | 62.23     | 45.45       |                 |
| Uncut_fwd        | TTATCTTGCATTTGCCAACTCG | 22            | 61.95     | 40.90       | 100             |
| Uncut_rev        | TGGGTTTCCCTGATTCTGAAA  | 21            | 61.84     | 42.85       |                 |
