# Supplementary material for: High-resolution targeted 3C interrogation of cis-regulatory element organization at genome-wide scale
Source: PubMed Central journal article supplement (PMC7822813; doi:10.1038/s41467-020-20809-6), 2021-01-22
Supplement: 41467_2020_20809_MOESM4_ESM.pdf [file 41467_2020_20809_MOESM4_ESM.pdf]

**File Name:** Supplementary Data 1.

**Description:** 3C Digestion efficiency qPCR primers for mouse.

**File Name:** Supplementary Data 2.

**Description:** Capture-C oligonucleotide sequences and locations.
